# Supplementary material
Source: Springer Nature journal article supplement (https://www.springermedizin.de/resource/supplementary/12884_2010_394_MOESM2_ESM.pdf/9457606)

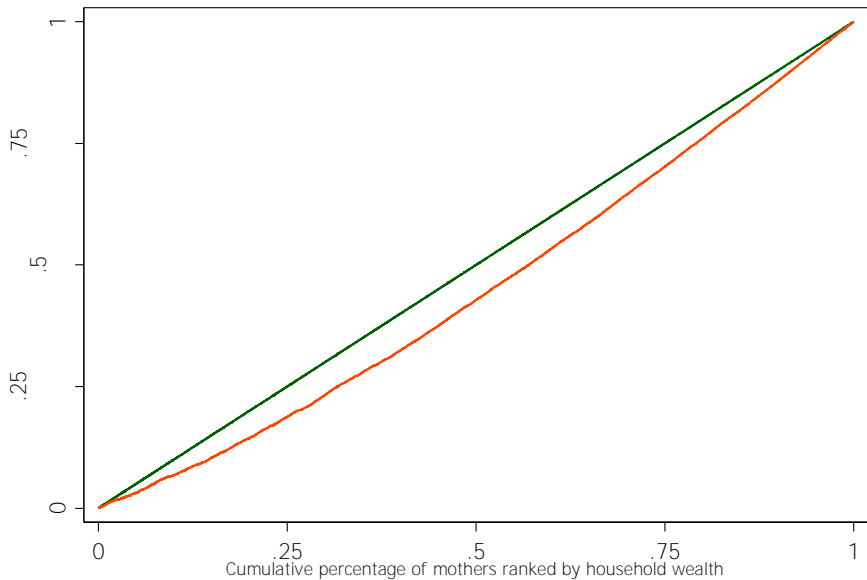

Note: The diagonal indicates the line of equality

Supplement: MOESM2 [file 9457606]
